# Supplementary figures and images for: Determining the Protective Efficacy of Toll-Like Receptor Ligands to Minimize H9N2 Avian Influenza Virus Transmission in Chickens
Source: MDPI journal article supplement (doi:10.3390/v15010238), 2023-01-14

Supplementary Fig. 3

Oral Shedding

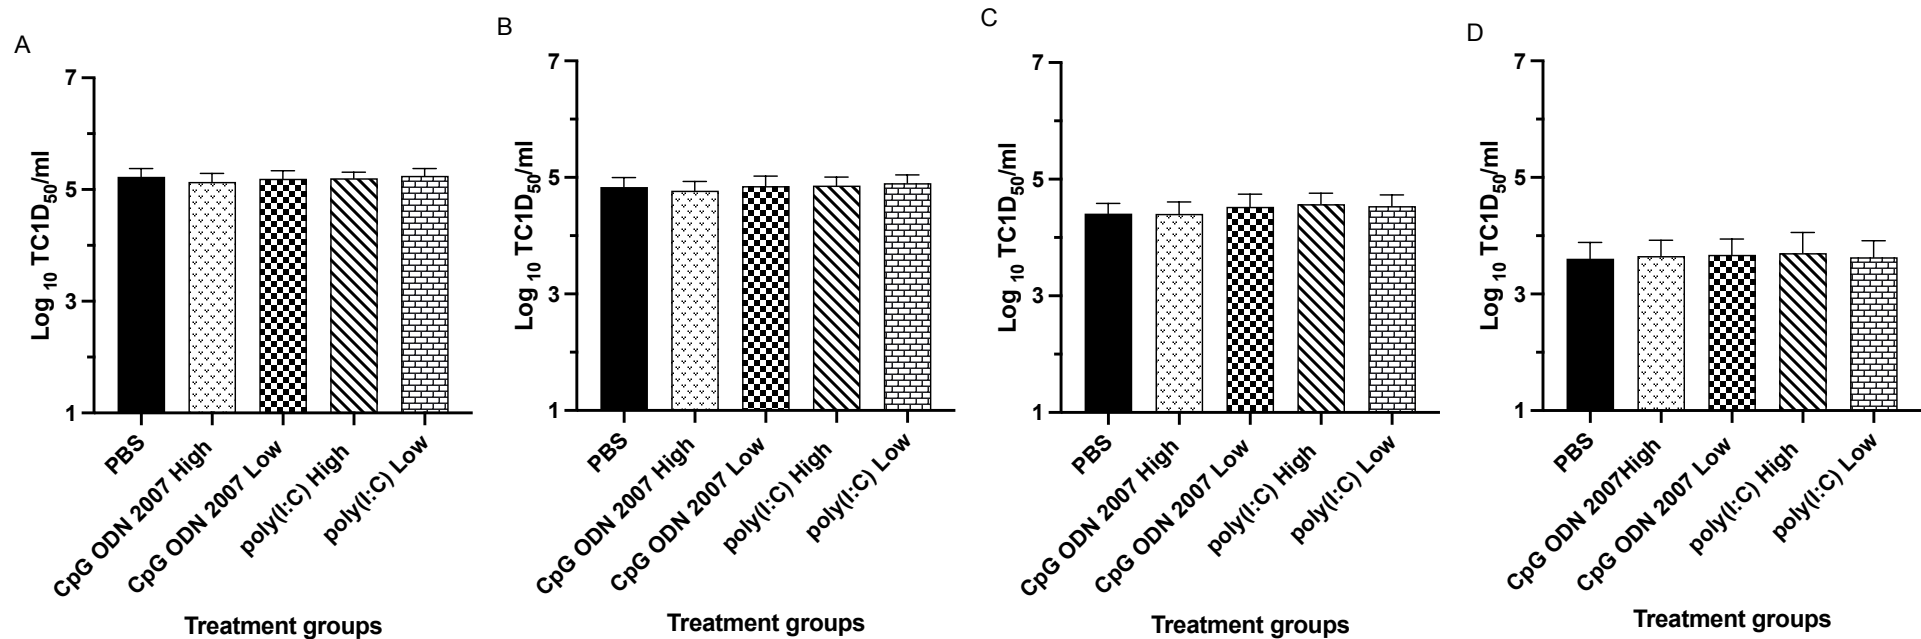

Cloacal Shedding

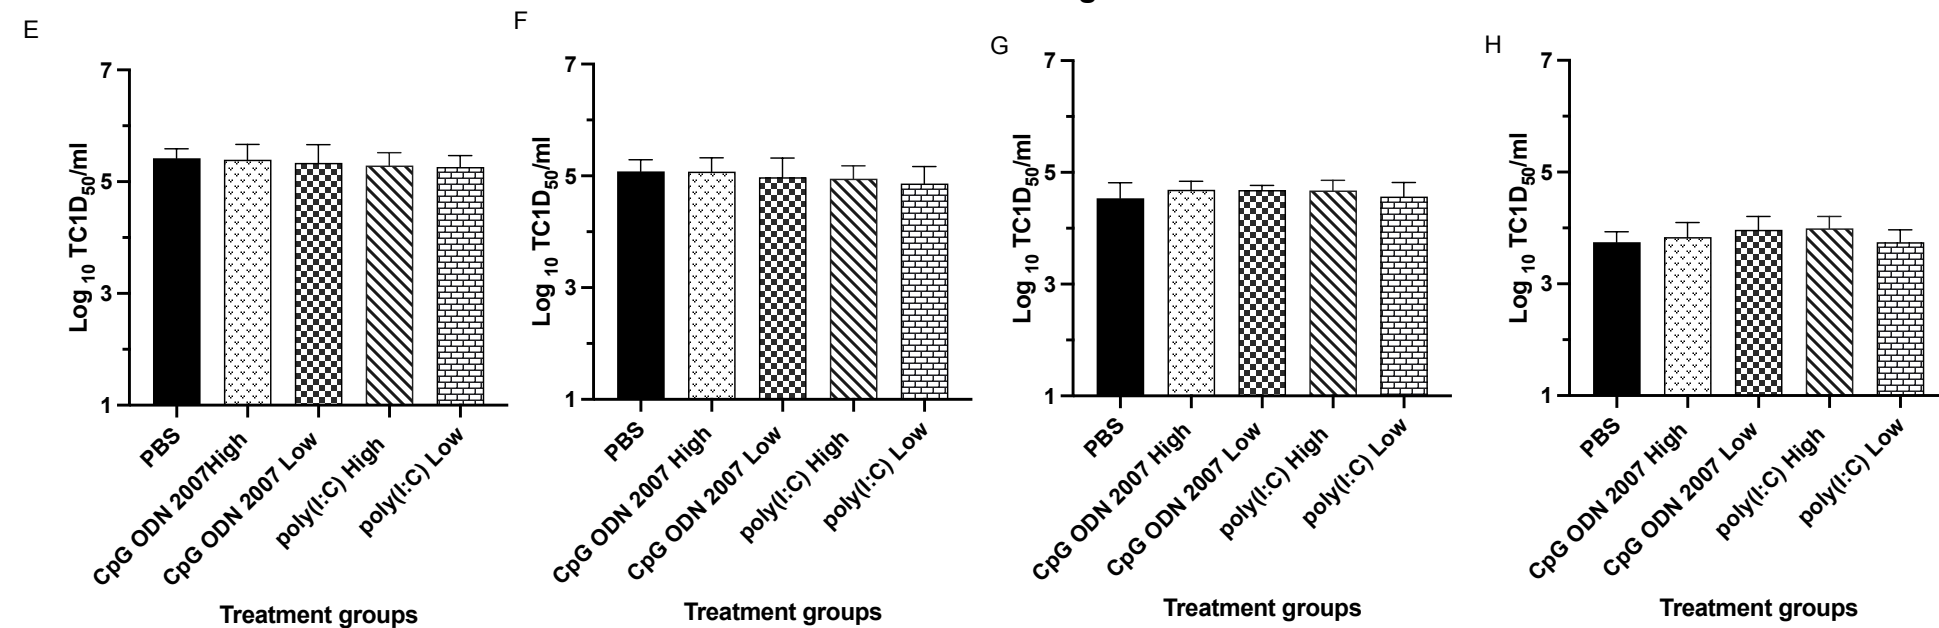

Supplement: s1 [file s1]
